# Supplementary material for: Transgenic mouse model of early-onset DYT1 dystonia
Source: Oxford University Press journal article supplement (doi:10.1093/hmg/ddi012), 2004-11-17
Supplement: ddi012_Supplementary_Data.zip [file ddi012_Supplementary_Data.zip]

Archive with 8 entries (8 files):
- e._Wildtype_control.mov
- d._Circling.mov
- Supplemental_Figures.doc
- f._head-shaking_in_DYT1_mouse.mov
- b._Limb-clasping_in_DYT1__mouse.mov
- Supplemental_data.pdf
- c._Wildtype_control.mov
- a._Wild_type_Control.mov
